# Supplementary material
Source: Springer Nature journal article supplement (https://www.springermedizin.de/resource/supplementary/13054_2010_8860_MOESM1_ESM.pdf/9732764)
Supplement: MOESM1 [file 9732764]

| Microarray Data Repositories   |    |
|--------------------------------|----|
| 142 datasets                   |    |
| Gene Expression Omnibus        | 44 |
| Array Express                  | 44 |
| Center for Information Biology | 54 |
| Gene Expression Database       |    |

| Electronic Databases |       |
|----------------------|-------|
| 7,548 citations      |       |
| Medline              | 5,000 |
| Embase               | 2,548 |

**66 excluded;**

- Duplicates across repositories
- Non-sepsis studies

**7225 excluded;**

- Animals and *in vitro* experiments
- Non-genetic studies

| 76 abstracts examined   |    |
|-------------------------|----|
| Gene Expression Omnibus | 40 |
| Array Express           | 36 |

| 323 abstracts examined |     |
|------------------------|-----|
| Medline                | 105 |
| Embase                 | 218 |

**63 excluded;**

- Animals and *in vitro* experiments
- Used other tissues (e.g. spleen, platelet, brain, cord blood, lung)
- Studies on genetic polymorphism
- Studies on specific pathogens (e.g. small pox, Salmonella, Yersinia)

**293 excluded;**

- Studies on individual genes
- Studies on bacterium/virus
- Studies on other diseases

**13 experiment reports for full review**

**30 publications for full text review**

**3 excluded;**

- Duplicate dataset 1
- Not peer-reviewed 2

**12 excluded;**

- Did not use microarray 1
- Editorial 2
- HIV study 1
- Dengue fever study 1
- Malaria study 1
- Trauma study 2
- Acute lung injury study 1
- No sepsis/infection 3

**Cross-reference datasets with publications**

| TOTAL                                    |    |
|------------------------------------------|----|
| 12 cohorts                               |    |
| (784 participants)                       |    |
| Diagnostic studies                       | 4  |
| Prognostic studies                       | 3  |
| Functional studies                       | 4  |
| Combined diagnostic and functional study | 1  |
| Duplicate studies                        | 6  |
| <hr/>                                    |    |
| Total Publications                       | 18 |
